# Supplementary material
Source: publisher figshare collection journal article supplement (https://tandf.figshare.com/ndownloader/files/13359221)
Supplement: Supplementary file 1 [file 13359221]

# Annexes

Annex 1: Interview topic list

Annex 2: Method used to quantify the arguments made by farmers

Annex 3: Visualisation of conditions and factors per agro-ecological practice

Annex 1: Interview topic list

**Topic list**

Interviews were semi-structured, in which the following topics will be discussed:

Background questions

- Age?
- Level of education, what have you studied?
- Amount of hectares (ha)
- Since when do you manage your farm?
- How have you learned farming?

Identification of farming method:

- How do you understand ecological/sustainable agriculture?
- What type of practices do you implement with regard to water, soil, trees, and biodiversity?
- Which concrete problems do you have on your farm?
- Do you want to change your farm system in one that is more sustainable?

Agro-ecological practices

| **Practices** | **Why these practices and not others, what are the obstacles for doing these practices, what are the conditions for doing them?** |
| --- | --- |
| Hedges and borders |  |
| Sediment traps/dams |  |
| Ground cover |  |
| Compost, mulch, manure |  |
| Tilling |  |
| Integrated plague management |  |
| Integrated livestock |  |
| Crop diversity |  |
| Polinization |  |

Identification and characterisation of conditions/factors:

| **Economic** | Do you have a farm management system?  Does the farm give you enough profits to live well?  What goes bad? Do you have high costs, are prices low, do you get subsidies?  What are your costs per hectare? What income do you have per hectare?  Which subsidies do you get? |
| --- | --- |
| **Social** | Do you work together with your neighbours, why?  Do you try many new things?  If you try new things, do you think your neighbour likes what you do or do they think you are weird? |
| **Informational** | Have you received any help or workshops from someone/organization? |
|  | Is it easy to obtain information on agricultural practices? Who gives this information? Is the information trustworthy? |
| **Political** | Which practices does the government want you to implement? Do they support you?  What are the environmental subsidies and rules? Do they function well? |

## Annex 2. Method used to quantify the arguments made by farmers

The Following table shows how the data were quantified. When an argument was made by a farmer, this was put into the table using a -1 or +1. For example: one farmer said he did not implement ground cover because of his opinion of his neighbour who did: that farm was “ugly because it had weeds”. This argument was then placed in ‘cultural setting’, and ‘peer pressure’ under legitimacy. Arguments could be placed under multiple headings if this was deemed appropriate. In the end all the -1 and +1 were added up to get to a final score.


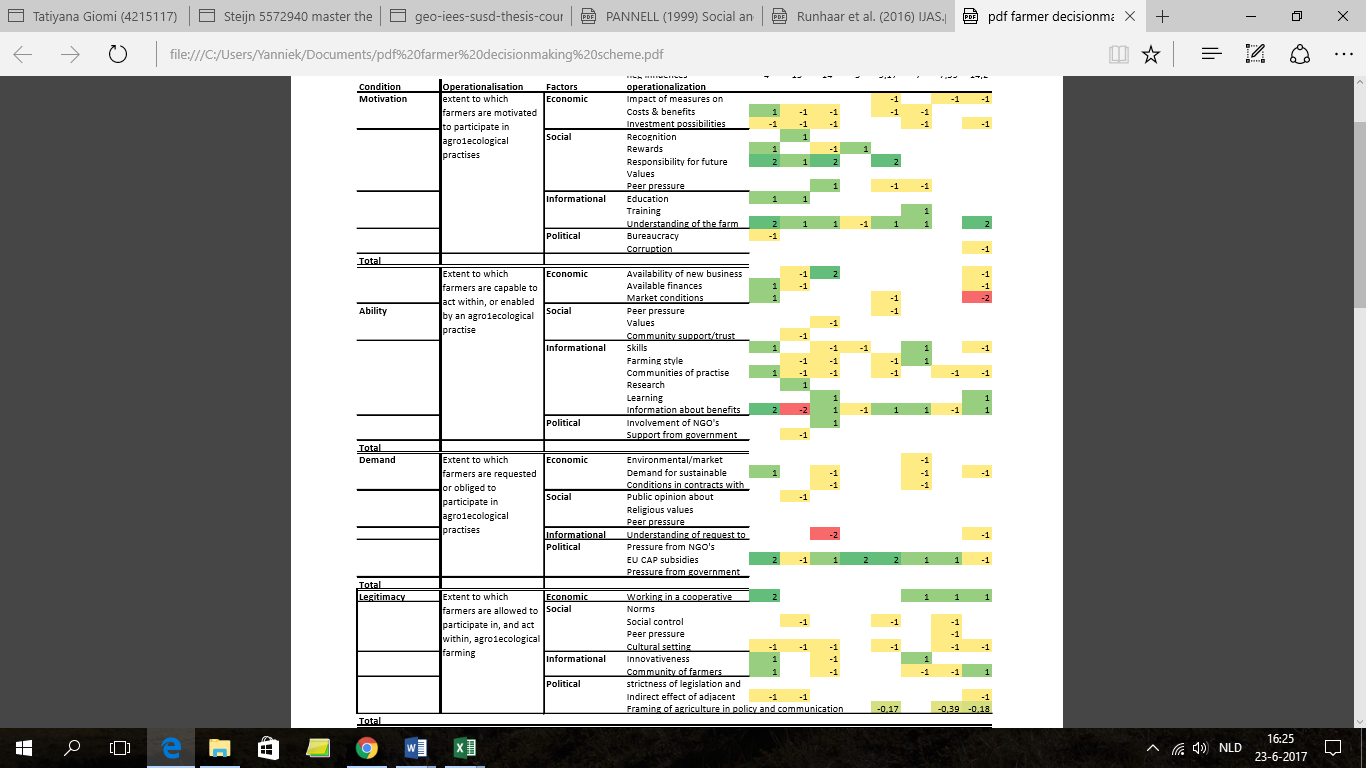


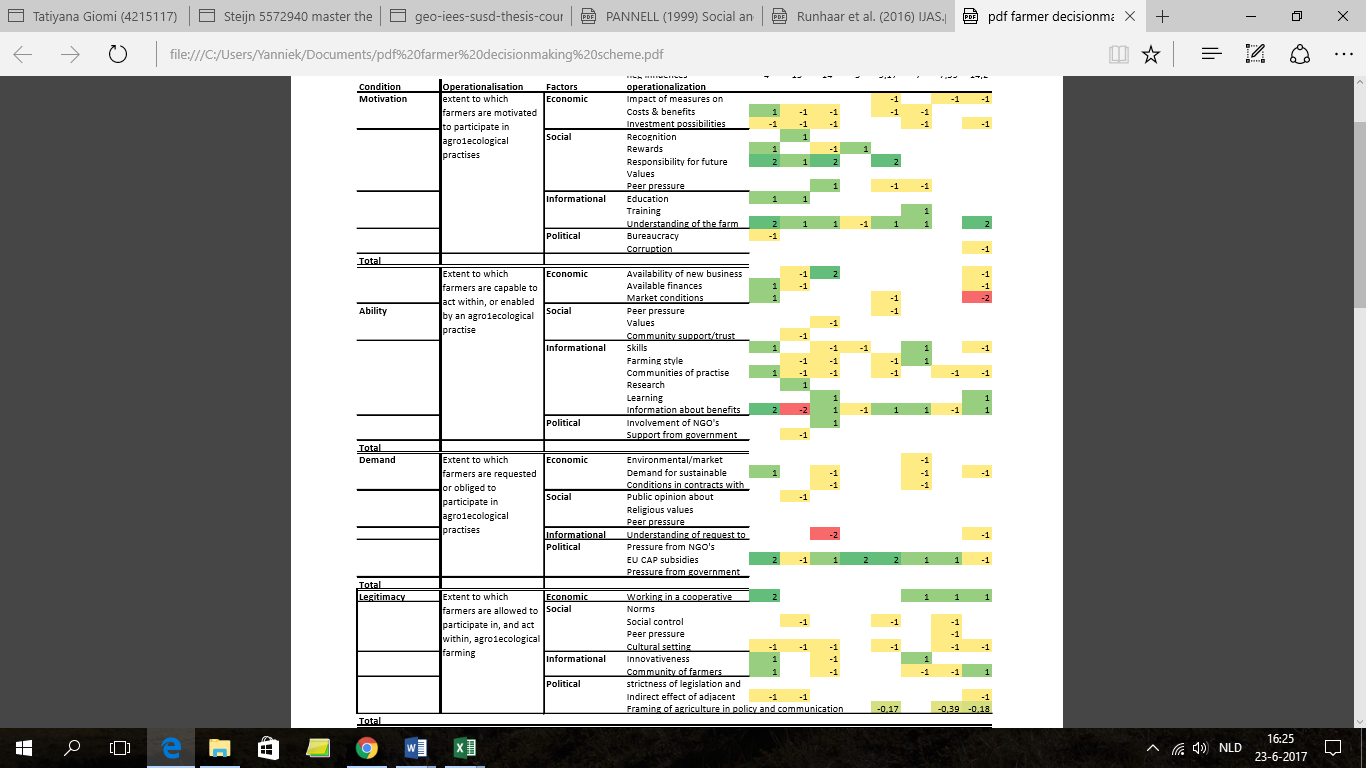


##

## Annex 3. Visualisation of conditions and factors per practice

###
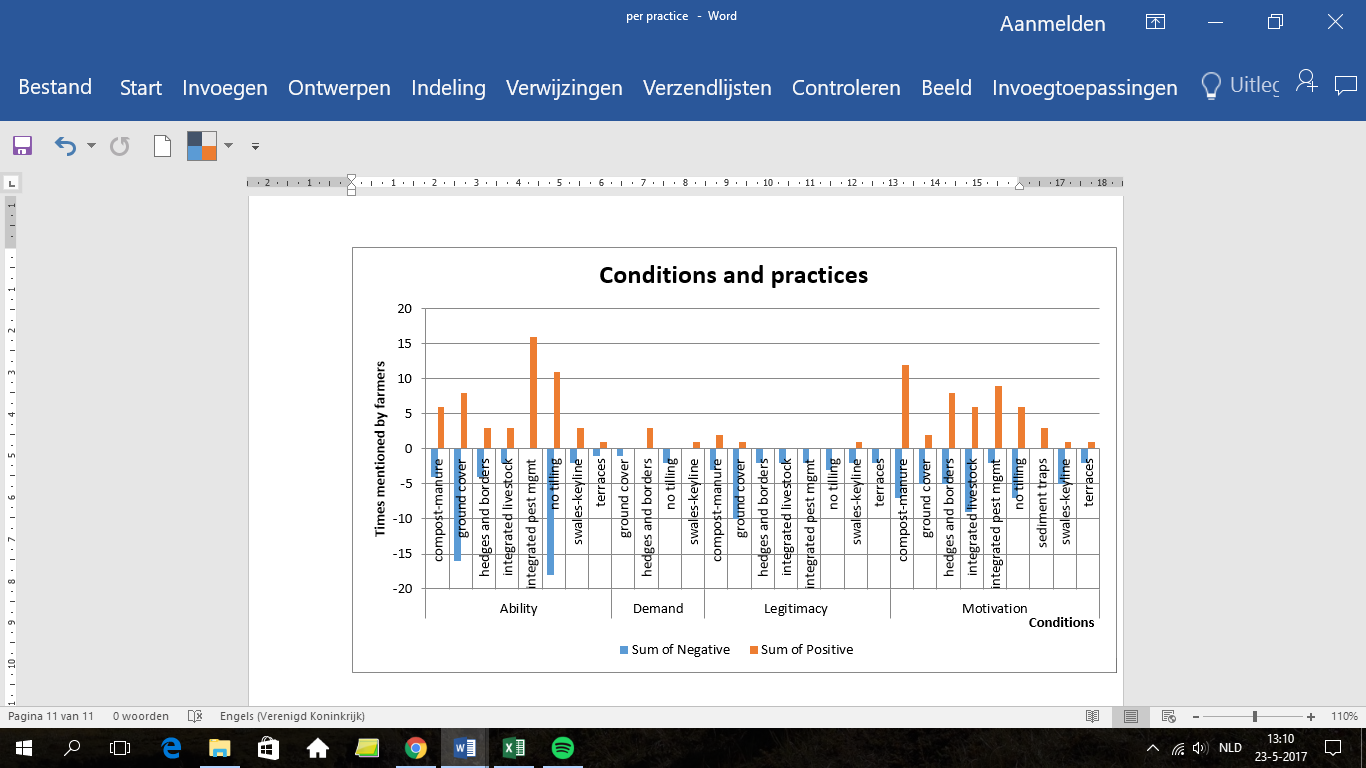
Conditions and practices

###
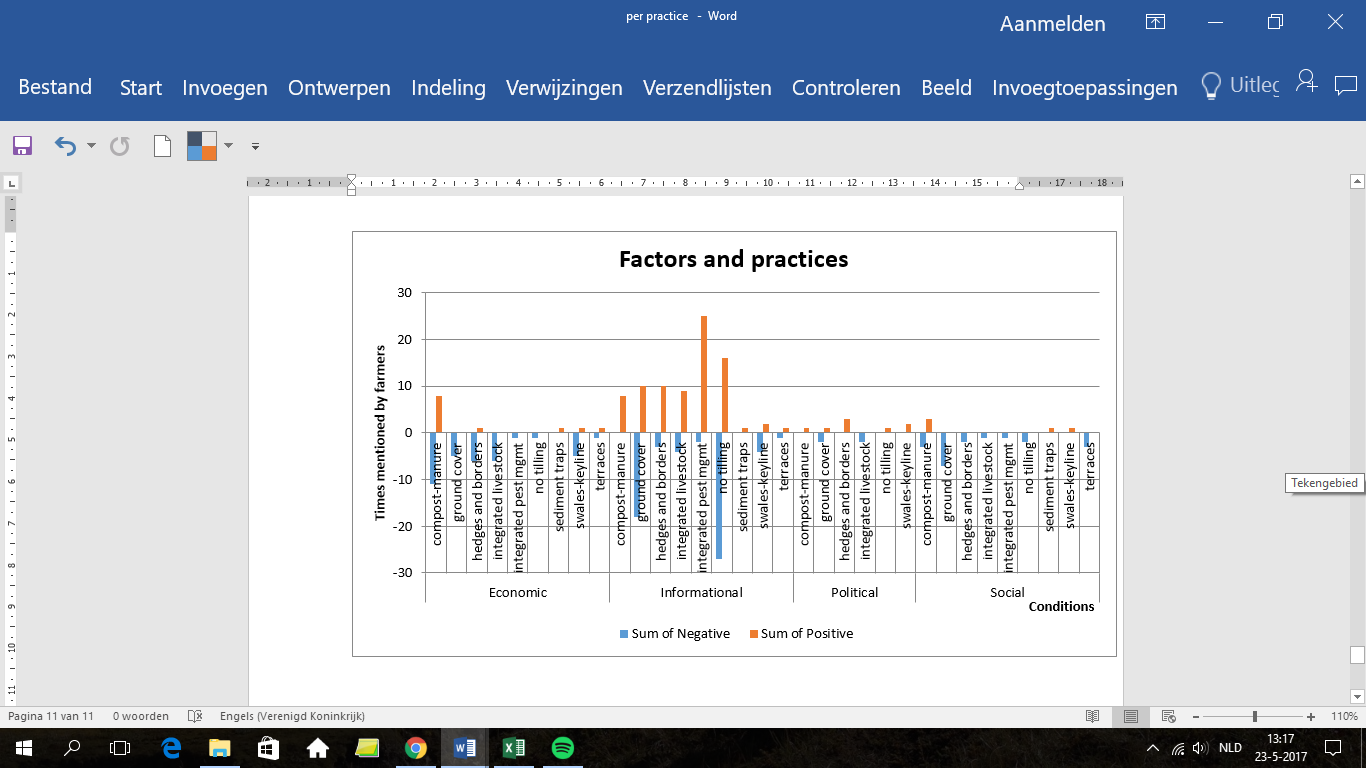
Factors and practices

Analysis of the interviews per regenerative practice

### Compost

### Ground cover

### Hedges and borders

### Integrated livestock

### No/minimum tilling

Swales/keyline
